# Supplementary material for: A novel canine reference genome resolves genomic architecture and uncovers transcript complexity
Source: PubMed Central journal article supplement (PMC7875987; doi:10.1038/s42003-021-01698-x), 2021-02-10
Supplement: 42003_2021_1698_MOESM1_ESM.pdf [file 42003_2021_1698_MOESM1_ESM.pdf]

## Supplementary Figures

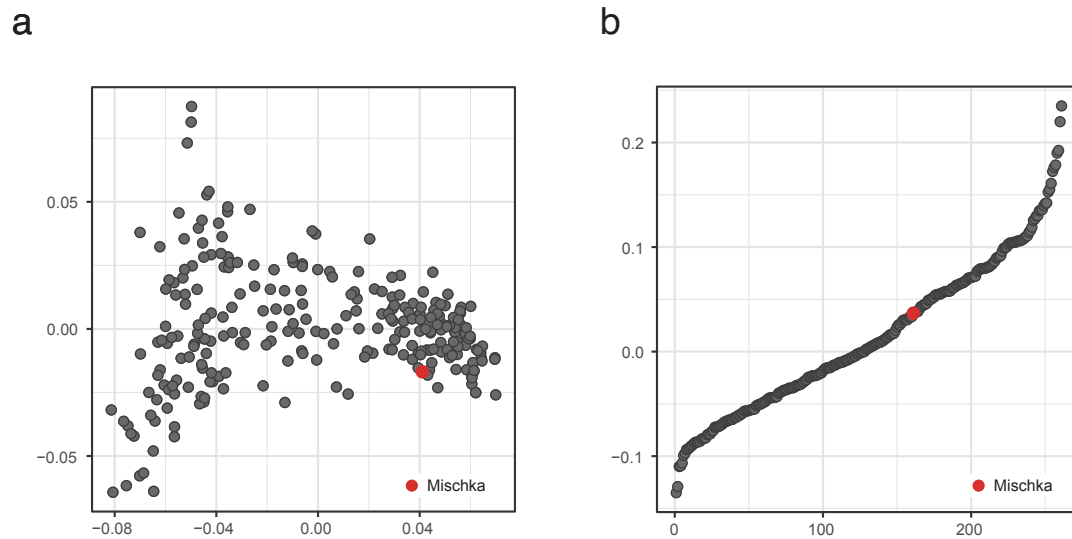

**Supplementary Figure 1. Genetic relationship between Mischka and other German Shepherds.** a) Multidimensional scaling (MDS) plot shows that Mischka falls within the cluster of 260 German Shepherds from a previous study<sup>1</sup>. b) The inbreeding coefficient for Mischka is 0.037, indicating that Mischka has an acceptable inbreeding level.

a

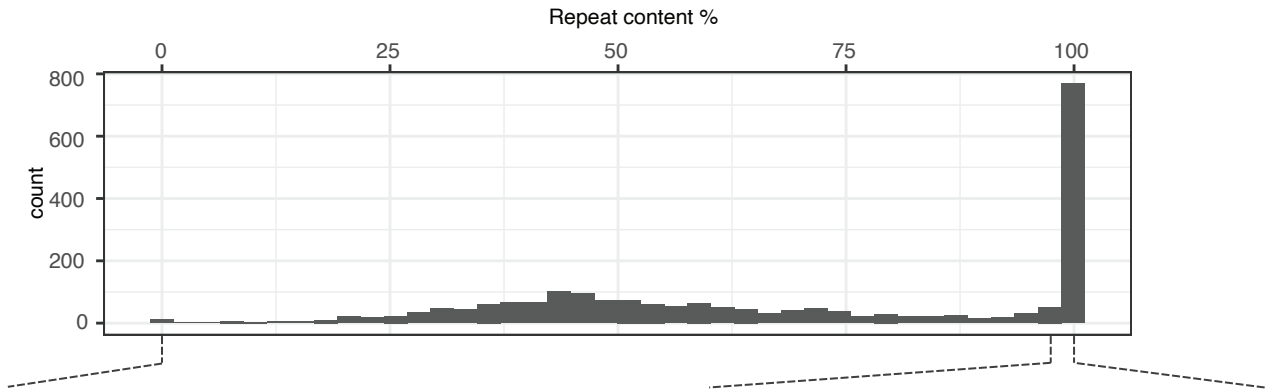

c

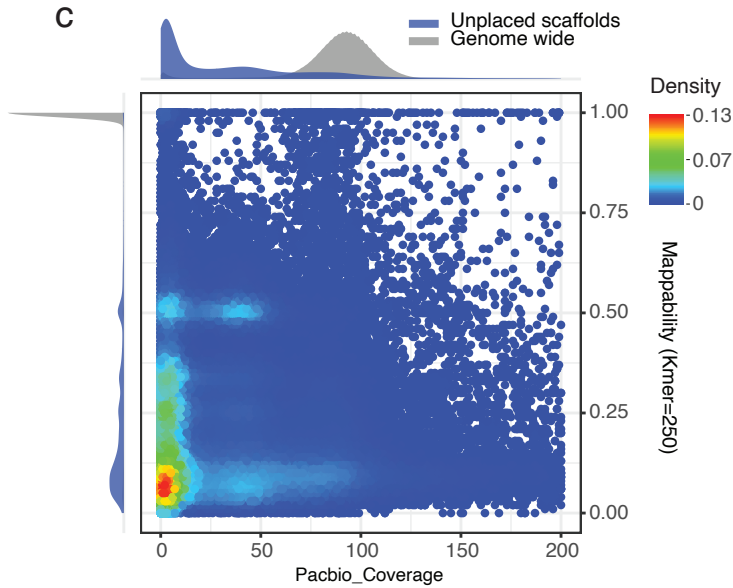

b

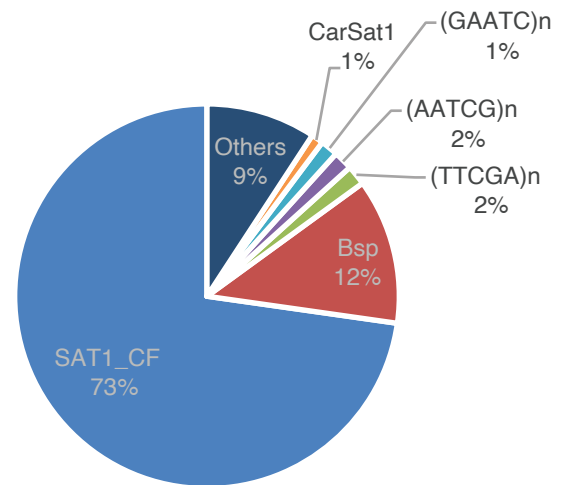

**Supplementary Figure 2. Sequence characteristics of 2,159 unplaced scaffolds in GSD\_1.0.** For each unplaced scaffold, we calculated the repeat content and the average of mappability (k-mer = 250 bp). a) Distribution of the repeat content for unplaced scaffolds. 871 scaffolds are found with content >90%. b) The most common repeat is SAT1\_CF, which is a known centromeric repeat. c) Of the remaining scaffolds, most have lower coverage and mappability compared to the chromosome level scaffolds, suggesting they could be from the genomic duplication regions.

CanFam3.1

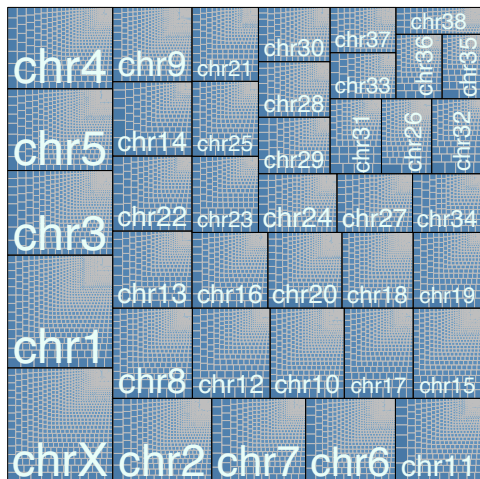

GSD1.0

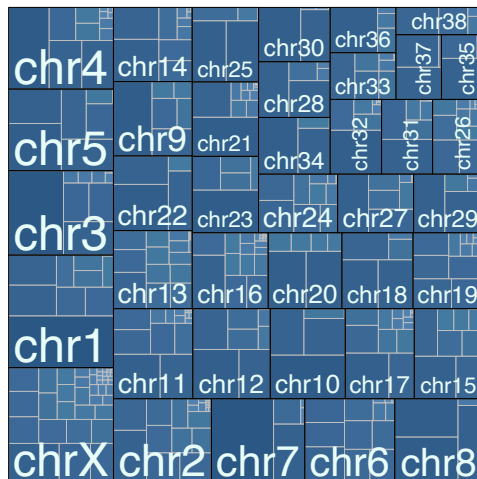

Contig size (bp)

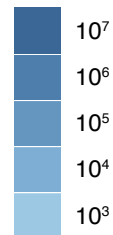

Supplementary Figure 3. Treemap of CanFam3.1 and GSD\_1.0 contigs scaled by length.

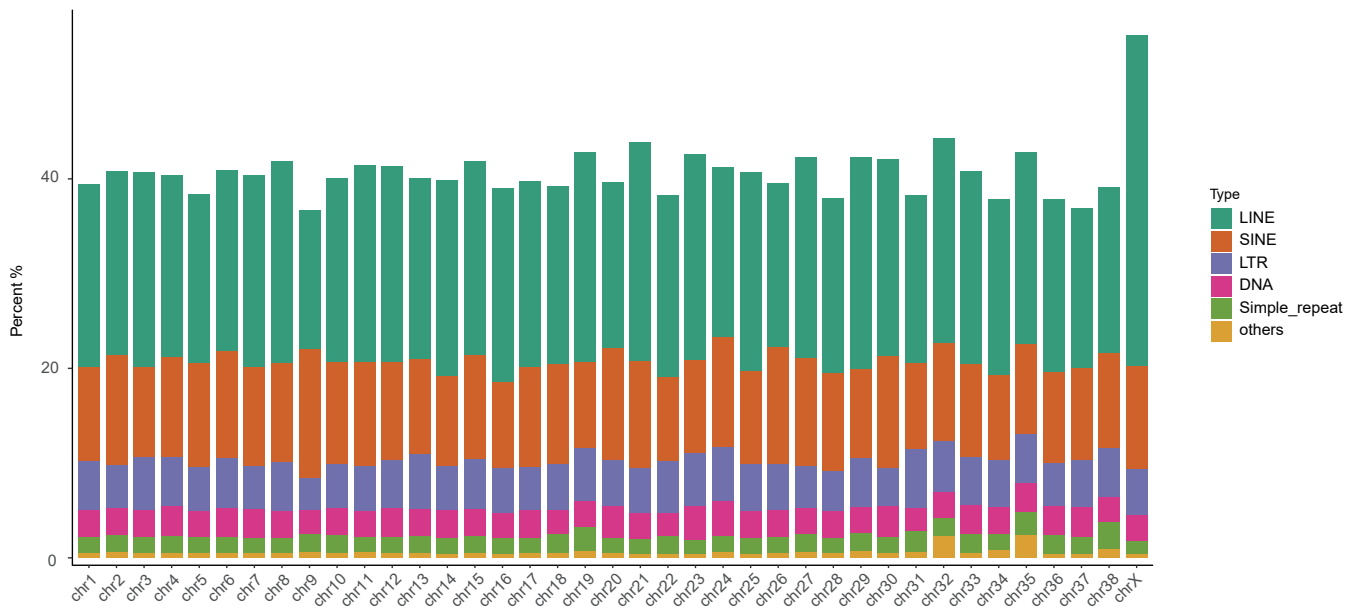

**Supplementary Figure 4. Content of repetitive elements on each GSD\_1.0 chromosome.** The repeat content is stable between autosomes. Chromosome X shows a relatively higher repeat content by virtue of having more LINEs.

BLAST classification for protein coding genes in GSD\_1.0 and in the Broad extended CanFam3.1 ENSEMBEL annotation

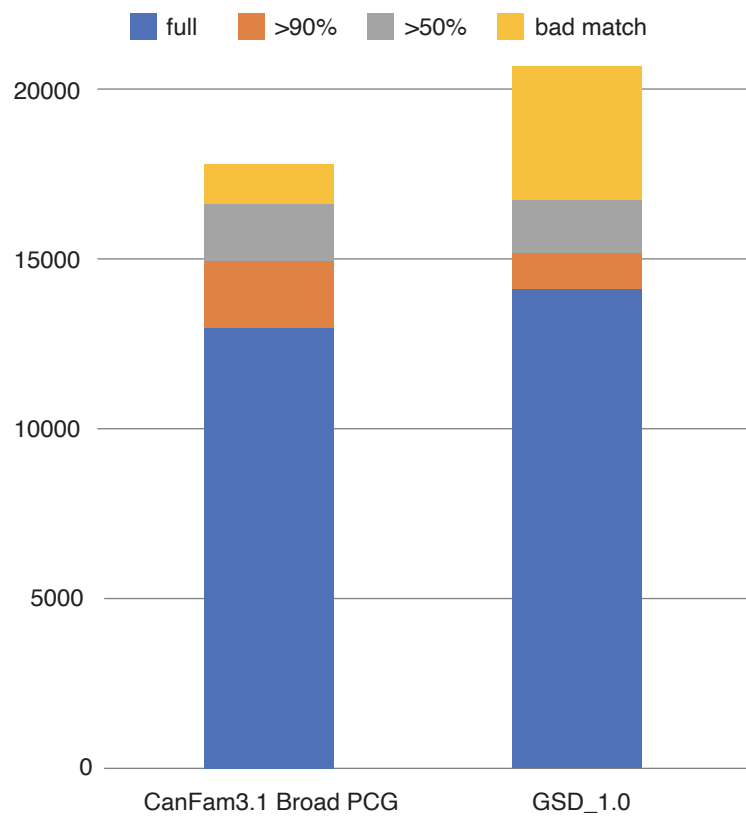

**Supplementary Figure 5. Comparison between length of the best BLAST hit for genes in GSD\_1.0 and CanFam3.1 annotation.**

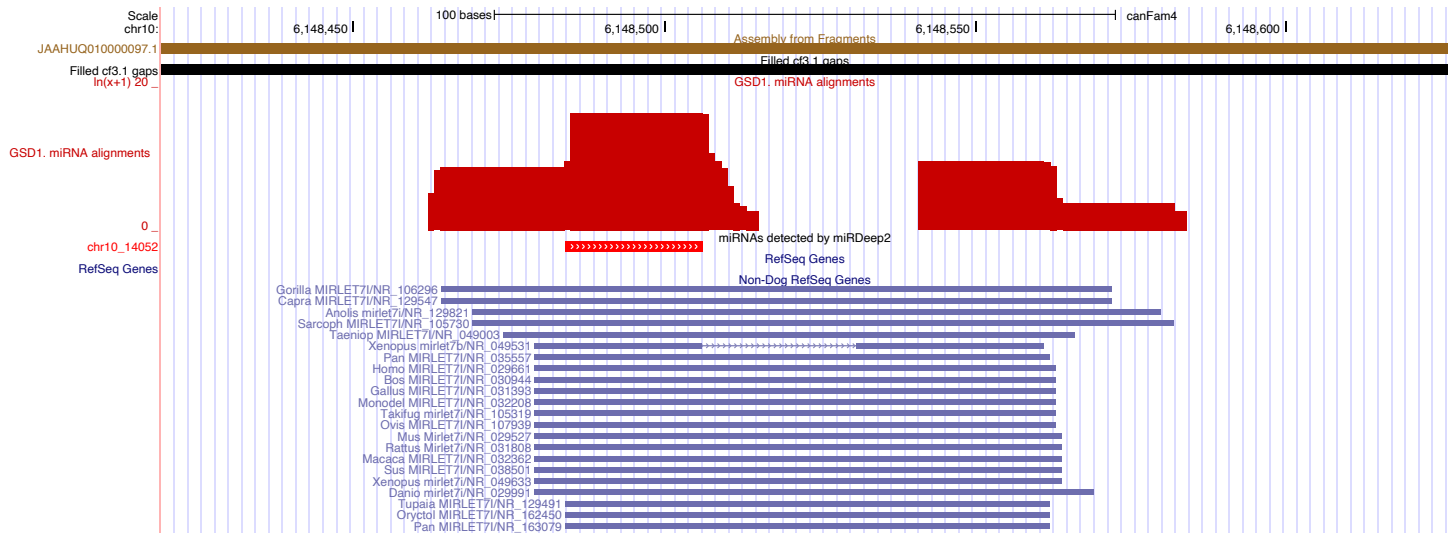

**Supplementary Figure 6. Mirlet7i identified from GSD\_1.0.** mirlet7i has the 16th highest miRDeep2 score, with close to 11 million aligned reads from the combined miRNA-seq dataset located within a filled CanFam3.1 gap.

**a**

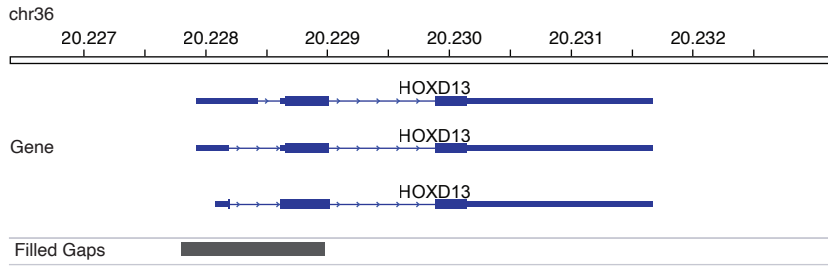

**b**

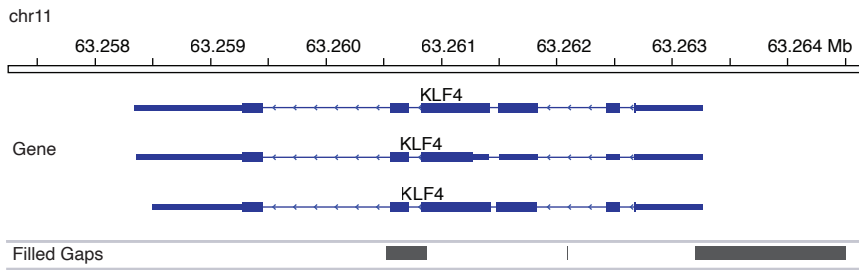

**Supplementary Figure 7. Filled CanFam3.1 gaps in cancer genes from the COSMIC database. a) *HOXD13* gene and b) *KLF4* gene**

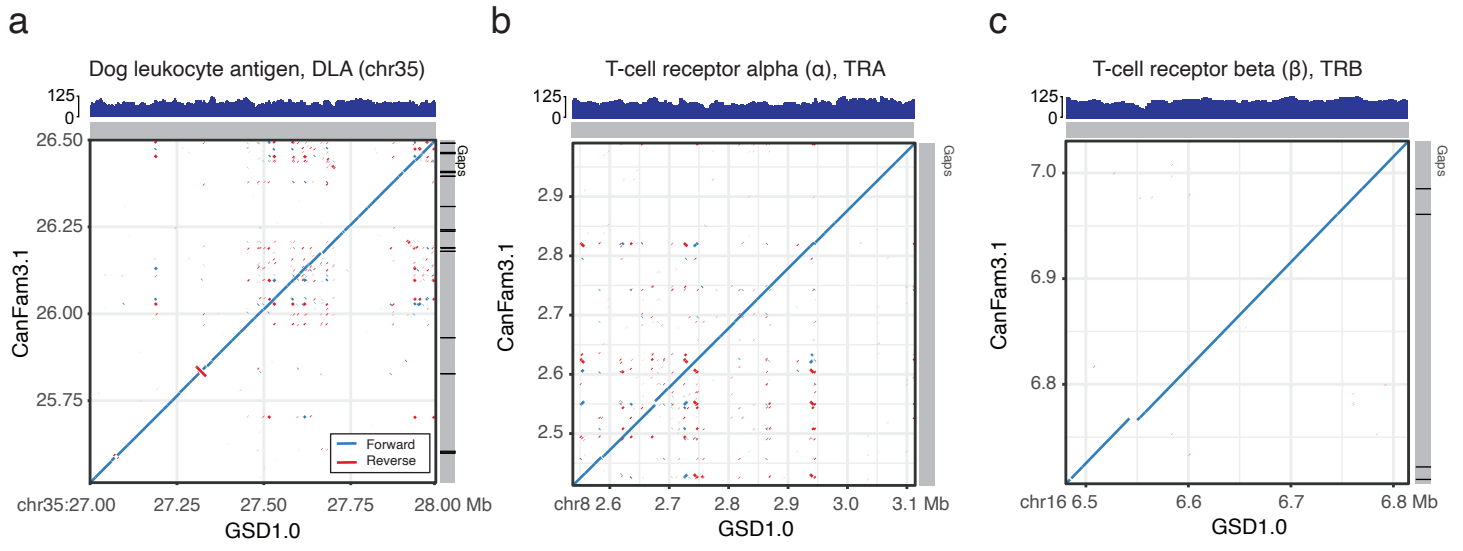

**Supplementary Figure 8. Sequence comparison of immunity loci between GSD\_1.0 and CanFam3.1.** Blue indicates a forward alignment, and red indicates a reverse alignment. A) Dog leukocyte antigen locus (DLA) on chromosome 35. b) The T-cell receptor alpha (TRA) locus on chromosome 8, and c) T-cell receptor beta (TRB) locus on chromosome 16.



**a**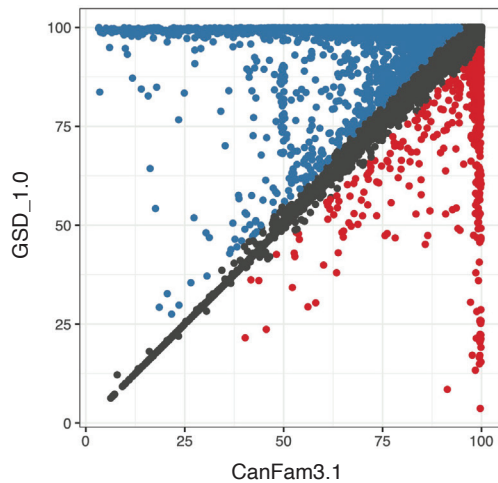**b**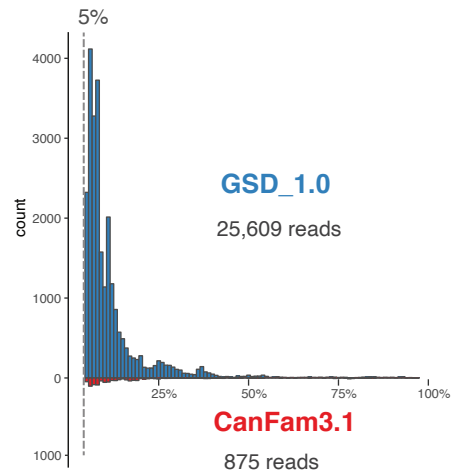

**Supplementary Figure 9. Iso-Seq data mapped to GSD\_1.0 and CanFam3.1.** a) The percentage of mapped bases for each read in the two assemblies. Each dot indicates an Iso-Seq read. Blue dots showed the reads with >5% more bases mapped in the GSD1.0 compared to CanFam3.1. Red dots indicated the reads have 5% more bases mapped in CanFam3.1. b) Distribution of mapping improvement for the two kinds of reads. Altogether 25,609 reads have at least 5% more bases mapped in the GSD\_1.0, whereas only 875 reads could be better mapped to CanFam3.1.

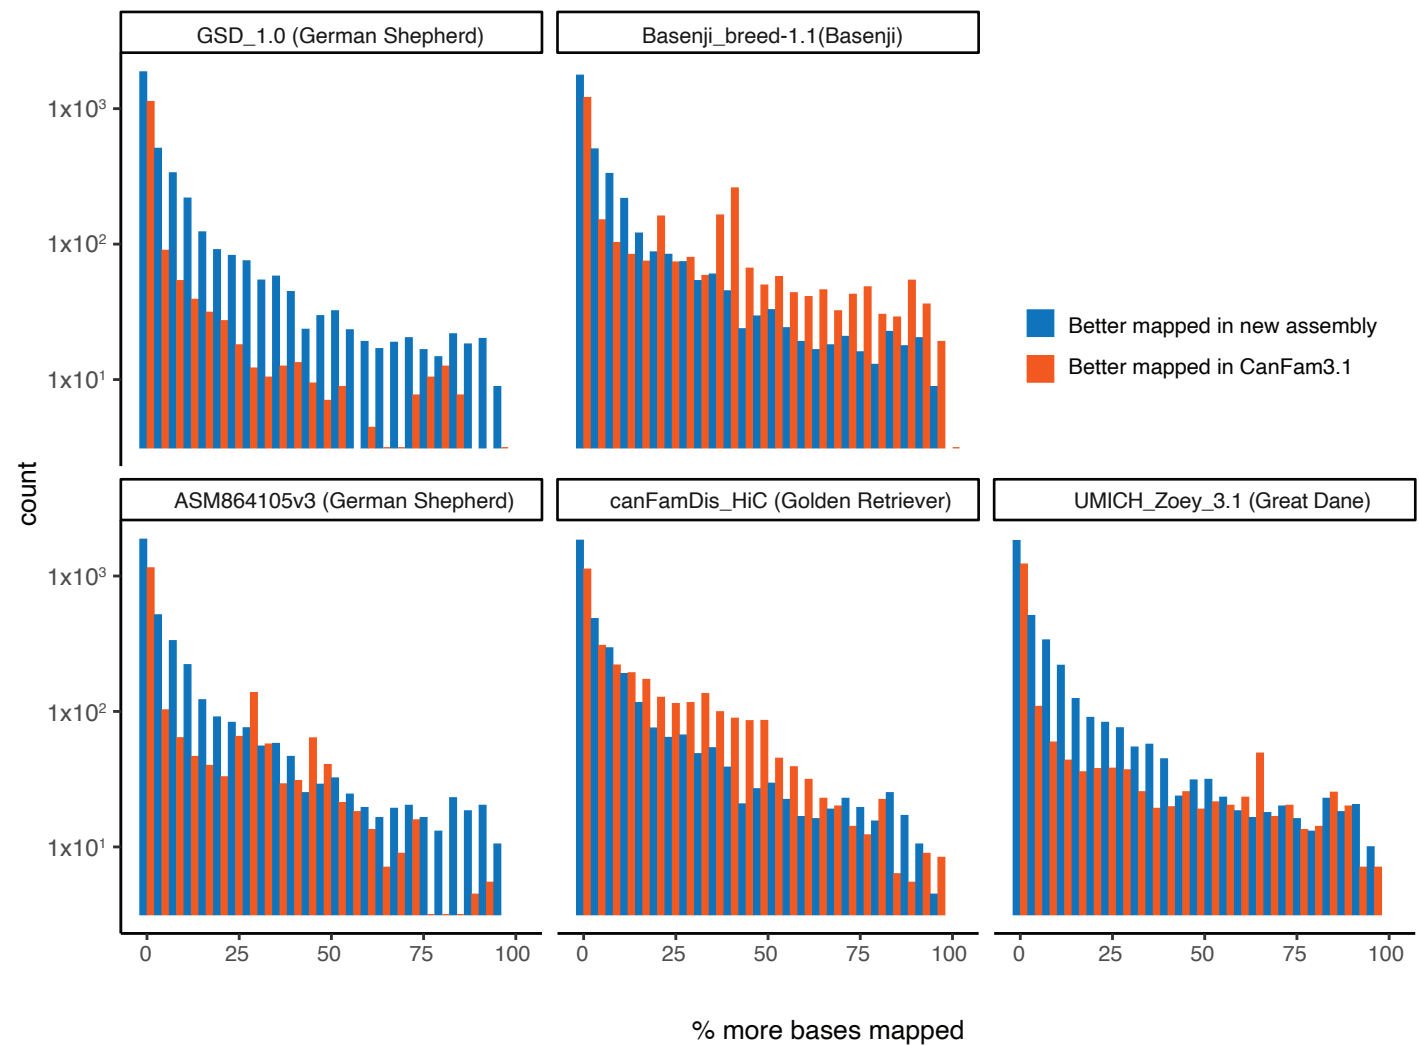

**Supplementary Figure 10. Mapping Iso-seq data to different canine assemblies.** Comparisons are made to CanFam3.1. We counted the mapped bases of each read, and calculated the difference in terms of percent more bases mapped between two assemblies. A single read could either be better mapped in CanFam3.1 (red) or in the newly released assembly GSD\_1.0 (blue)

a

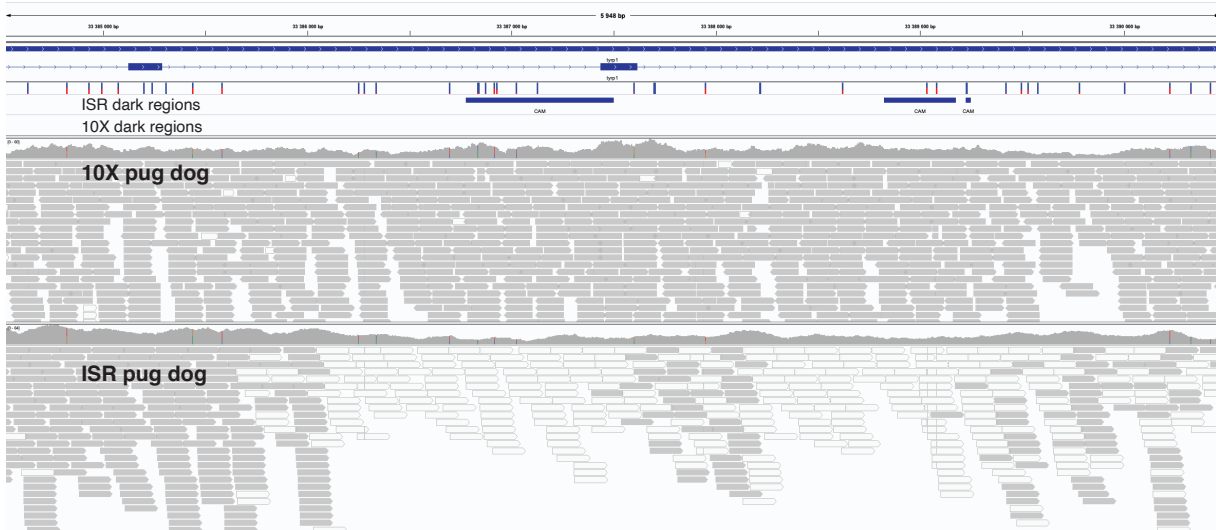

b

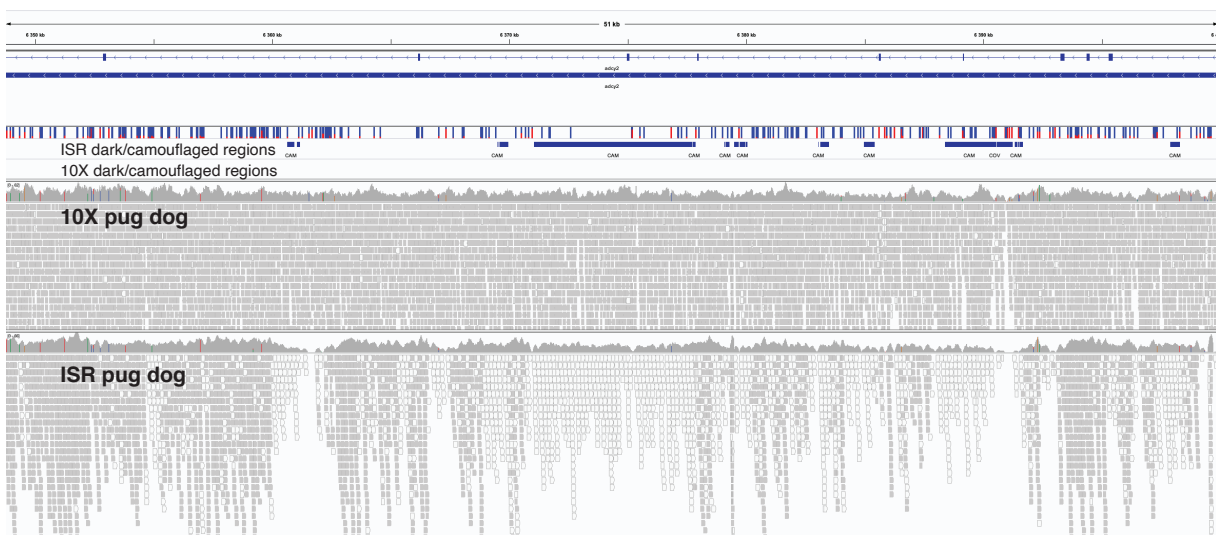

**Supplementary Figure 11. Illumina short reads (ISR) dark and camouflaged regions rescued by 10x sequencing.** IGV snapshot showed the dark/camouflaged regions detected from the ISR (25 dogs) and 10X (27 dogs) datasets, and illustrated the read alignments of one pug dog from each dataset. ISR dark/camouflaged regions in the a) *TYRP1* gene, and b) *ADCY2* gene.

**a**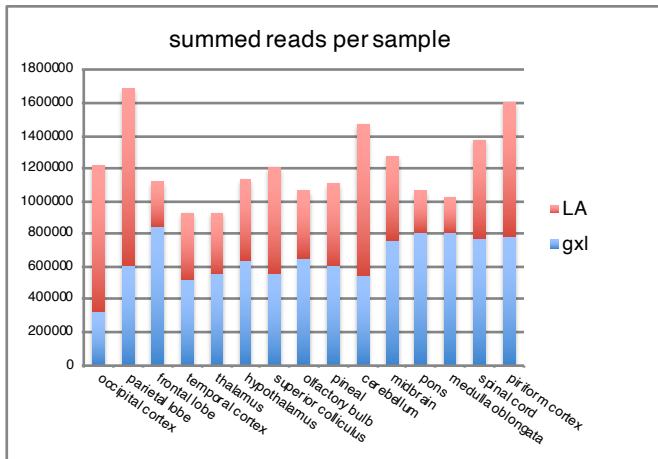**c**

Sequencing coverage for GSD\_1.0

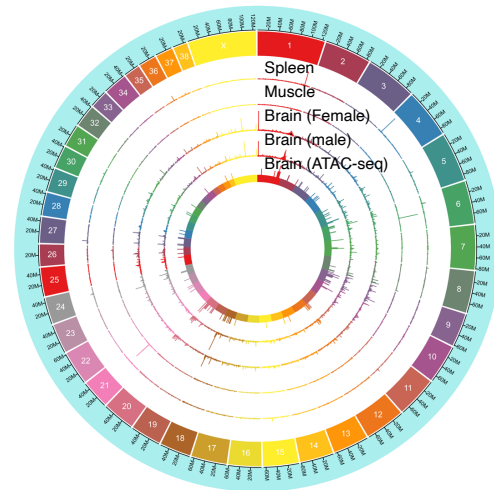**b**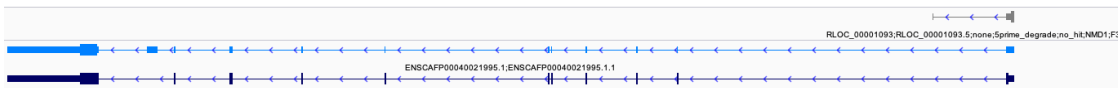

**Supplementary Figure 12. RNA sequencing of different tissues.** a) The total read numbers per tissue for a multiplexed run (2 flowcells) with female brain samples. N50 of reads was 2.4 kb, and amplification was done with two enzymes (LongAmp and GXL) to avoid coverage bias. b) Annotations were filtered to remove degraded transcripts (gray). Colors indicate the quality of BLAST hit as defined by TAMA: gray = no hit, dark blue = full hit, medium blue = 90% match, light blue = 50% match, light sky blue = bad hit. c) Read distribution for Nanopore samples for various tissues. To avoid issues with high coverage from tissue specific genes in transcript assembly and merging reads were assembled per sample type and resulting transcripts merged.

## Supplementary Tables

Supplementary Table 1. Summary of repetitive elements in GSD\_1.0

| Type<br>subtype            | number of<br>elements | length occupied<br>(bp) | percentage of<br>sequence (%) |
|----------------------------|-----------------------|-------------------------|-------------------------------|
| SINEs                      | 1538330               | 253126533               | 10.2                          |
| Alu/B1                     | 0                     | 0                       | 0                             |
| MIRs                       | 436540                | 64619318                | 2.6                           |
| LINEs                      | 878624                | 504530620               | 20.33                         |
| LINE1                      | 534540                | 413420208               | 16.66                         |
| LINE2                      | 292578                | 79467264                | 3.2                           |
| L3/CR1                     | 37964                 | 8374531                 | 0.34                          |
| RTE                        | 12346                 | 3077052                 | 0.12                          |
| LTR element                | 308696                | 120262262               | 4.85                          |
| ERVL                       | 90609                 | 40692875                | 1.64                          |
| ERVL-MaLRs                 | 146071                | 50536666                | 2.04                          |
| ERV_classI                 | 49789                 | 23477942                | 0.95                          |
| ERV_classII                | 0                     | 0                       | 0                             |
| DNA element                | 325449                | 68706785                | 2.77                          |
| hAT-Charlie                | 187859                | 36590816                | 1.47                          |
| TcMar-Tigger               | 49675                 | 14764477                | 0.59                          |
| Unclassified               | 5213                  | 965509                  | 0.04                          |
| Total interspersed repeats |                       | 947591709               | 38.18                         |
| Small RNA                  | 1141119               | 191329823               | 7.71                          |
| Satellites                 | 3922                  | 52090599                | 2.1                           |
| Simple repeats             | 955316                | 50351697                | 2.03                          |
| Low complexity             | 129088                | 7138943                 | 0.29                          |

Supplementary Table 2. Tissues used in RNA experiments

| Sample  |                        |        |             | Purpose*      | Tissue RIN |              |              |                   |          |                  |                |               |        |                 |      |             |                     |                 |          |                 |       |      |          |        |       |        |       |        |        |
|---------|------------------------|--------|-------------|---------------|------------|--------------|--------------|-------------------|----------|------------------|----------------|---------------|--------|-----------------|------|-------------|---------------------|-----------------|----------|-----------------|-------|------|----------|--------|-------|--------|-------|--------|--------|
| ID      | Breed                  | Sex    | Age (years) |               | Cerebellum | Frontal lobe | Hypothalamus | Medulla oblongata | Midbrain | Occipital cortex | Olfactory bulb | Parietal lobe | Pineal | Piriform cortex | Pons | Spinal cord | Superior colliculus | Temporal cortex | Thalamus | Skeletal muscle | Heart | Lung | Pancreas | Kidney | Ovary | Testis | Liver | Spleen | Retina |
| na§     | Beagle                 | na     | na          | Iso-Seq       | -          | -            | 8.0          | -                 | -        | -                | -              | -             | -      | -               | -    | -           | -                   | -               | -        | -               | -     | -    | -        | -      | -     | -      | -     | -      | -      |
| na      | Beagle                 | Female | na          | Nano/miRNA    | 8.2        | 8.6          | 8.8          | 7.9               | 7.9      | 7.6              | 8.7            | 8.2           | 8.4    | 8.7             | 8.5  | 8.6         | 8.1                 | 7.9             | 7.9      | 7.8             | 8.0   | -    | -        | 3.5    | 5.8   | -      | -     | 4.8    | -      |
| na      | Beagle                 | Male   | na          | Nano/miRNA    | 6.9        | 9.1          | 7.7          | 7.6               | 6.6      | 6.3              | 9.1            | 7.7           | 7.2    | 8.5             | 8.0  | 7.2         | 8.0                 | 8.0             | 5.8      | -               | -     | 7.7  | 6.2      | -      | -     | 5.8    | 5.0   | -      | -      |
| na      | Beagle                 | Female | 12          | Nano/Illumina | -          | -            | -            | -                 | -        | -                | -              | -             | -      | -               | -    | -           | -                   | -               | -        | -               | -     | -    | -        | -      | -     | -      | -     | 8.0    |        |
| 14S     | Beagle                 | Male   | na          | qCPR          | -          | -            | -            | -                 | -        | -                | -              | -             | -      | -               | -    | -           | -                   | -               | -        | -               | -     | -    | -        | -      | -     | -      | 6.2   | 3.6    | -      |
| 8L/5S   | Border Collie          | Female | 13          | qCPR          | -          | -            | -            | -                 | -        | -                | -              | -             | -      | -               | -    | -           | -                   | -               | -        | -               | -     | -    | -        | -      | -     | -      | 7.8   | 8.1    | -      |
| 1S      | Cocker Spaniel         | Male   | 9           | qCPR          | -          | -            | -            | -                 | -        | -                | -              | -             | -      | -               | -    | -           | -                   | -               | -        | -               | -     | -    | -        | -      | -     | -      | 8.1   | -      | -      |
| 3S      | Dachshund              | Female | 15          | qCPR          | -          | -            | -            | -                 | -        | -                | -              | -             | -      | -               | -    | -           | -                   | -               | -        | -               | -     | -    | -        | -      | -     | -      | 9.3   | -      | -      |
| 1L/4S   | Danish Swedish Farmdog | Female | 12          | qCPR          | -          | -            | -            | -                 | -        | -                | -              | -             | -      | -               | -    | -           | -                   | -               | -        | -               | -     | -    | -        | -      | -     | -      | 9.2   | 7.3    | -      |
| 10L     | German Shepherd        | Female | 12          | qCPR          | -          | -            | -            | -                 | -        | -                | -              | -             | -      | -               | -    | -           | -                   | -               | -        | -               | -     | -    | -        | -      | -     | -      | 8.1   | -      | -      |
| 18L/12S | German Shepherd        | Female | 12          | qCPR          | -          | -            | -            | -                 | -        | -                | -              | -             | -      | -               | -    | -           | -                   | -               | -        | -               | -     | -    | -        | -      | -     | -      | 6.0   | 5.9    | -      |
| 22L/15S | German Shepherd        | Female | 5           | qCPR          | -          | -            | -            | -                 | -        | -                | -              | -             | -      | -               | -    | -           | -                   | -               | -        | -               | -     | -    | -        | -      | -     | -      | 7.5   | 7.6    | -      |
| 24L/16S | German Shepherd        | Female | 1           | qCPR          | -          | -            | -            | -                 | -        | -                | -              | -             | -      | -               | -    | -           | -                   | -               | -        | -               | -     | -    | -        | -      | -     | -      | 7.7   | 8.0    | -      |
| 6S      | German Shepherd        | Female | 2           | qCPR          | -          | -            | -            | -                 | -        | -                | -              | -             | -      | -               | -    | -           | -                   | -               | -        | -               | -     | -    | -        | -      | -     | -      | 8.5   | -      | -      |
| 25L/17S | German Shepherd        | Male   | 1           | qCPR          | -          | -            | -            | -                 | -        | -                | -              | -             | -      | -               | -    | -           | -                   | -               | -        | -               | -     | -    | -        | -      | -     | -      | 7.4   | 8.3    | -      |
| 5L/10S  | German Shepherd        | Male   | 12          | qCPR          | -          | -            | -            | -                 | -        | -                | -              | -             | -      | -               | -    | -           | -                   | -               | -        | -               | -     | -    | -        | -      | -     | -      | 7.3   | 7.6    | -      |
| 12L/8S  | Golden Retriever       | Female | 11          | qCPR          | -          | -            | -            | -                 | -        | -                | -              | -             | -      | -               | -    | -           | -                   | -               | -        | -               | -     | -    | -        | -      | -     | -      | 7.7   | 7.7    | -      |
| 7L      | Greyhound              | Female | 12.5        | qCPR          | -          | -            | -            | -                 | -        | -                | -              | -             | -      | -               | -    | -           | -                   | -               | -        | -               | -     | -    | -        | -      | -     | -      | 7.6   | -      | -      |
| 17L     | Hovawart               | Female | 7           | qCPR          | -          | -            | -            | -                 | -        | -                | -              | -             | -      | -               | -    | -           | -                   | -               | -        | -               | -     | -    | -        | -      | -     | -      | 8.6   | -      | -      |
| 3L/11S  | Howawart               | Female | 11          | qCPR          | -          | -            | -            | -                 | -        | -                | -              | -             | -      | -               | -    | -           | -                   | -               | -        | -               | -     | -    | -        | -      | -     | -      | 8.7   | 8.0    | -      |
| 9L      | Howawart               | Female | 9           | qCPR          | -          | -            | -            | -                 | -        | -                | -              | -             | -      | -               | -    | -           | -                   | -               | -        | -               | -     | -    | -        | -      | -     | -      | 6.0   | -      | -      |
| 4L      | Howawart               | Male   | 11          | qCPR          | -          | -            | -            | -                 | -        | -                | -              | -             | -      | -               | -    | -           | -                   | -               | -        | -               | -     | -    | -        | -      | -     | -      | 6.8   | -      | -      |
| 11L     | Irish Setter           | Male   | 6           | qCPR          | -          | -            | -            | -                 | -        | -                | -              | -             | -      | -               | -    | -           | -                   | -               | -        | -               | -     | -    | -        | -      | -     | -      | 7.7   | -      | -      |
| 6L/2S   | Irish Setter           | Male   | na          | qCPR          | -          | -            | -            | -                 | -        | -                | -              | -             | -      | -               | -    | -           | -                   | -               | -        | -               | -     | -    | -        | -      | -     | -      | 8.8   | 7.9    | -      |
| 2L      | Mixed Breed            | na     | na          | qCPR          | -          | -            | -            | -                 | -        | -                | -              | -             | -      | -               | -    | -           | -                   | -               | -        | -               | -     | -    | -        | -      | -     | -      | 7.2   | -      | -      |
| 13L/7S  | Poodle Medium          | Female | 13          | qCPR          | -          | -            | -            | -                 | -        | -                | -              | -             | -      | -               | -    | -           | -                   | -               | -        | -               | -     | -    | -        | -      | -     | -      | 6.6   | 7.2    | -      |
| 23L     | Swedish Elkhound       | Female | 9           | qCPR          | -          | -            | -            | -                 | -        | -                | -              | -             | -      | -               | -    | -           | -                   | -               | -        | -               | -     | -    | -        | -      | -     | -      | 6.5   | -      | -      |

\*Iso-Seq, PacBio Iso-Seq; Nano, nanopore sequencing; miRNA, miRNA-Sequencing; Illumina, Illumina NovaSeq

§ Sample commercially supplied as total RNA

na, not available

Supplementary Table 3. Filled CanFam3.1 gaps within the cancer genes from COSMIC

|                                  | COSMIC tier1 genes | COSMIC tier2 genes |
|----------------------------------|--------------------|--------------------|
| Number of genes in GSD1.0        | 532                | 128                |
| Number of genes with filled gaps | 286                | 80                 |
| Number of the filled gaps        | 531                | 182                |
| Exons (count/length)             | 328/92.2 Kb        | 94/30.4 Kb         |
| coding sequences (count/length)  | 241/46.2 Kb        | 77/18.0 Kb         |
| 5'UTR (count/length)             | 310/61.5 Kb        | 115/21.0 Kb        |
| 3'UTR (count/length)             | 54/17.7 Kb         | 14/2.8 Kb          |

Supplementary Table 4. Summary of available dog assemblies from public resources

| Assembly          | Origin           | Name    | Sequencing Tech.      | total length (bp) | Number of scaffolds | N50 (bp)   | NCBI Accession/Links                                                                                                            |
|-------------------|------------------|---------|-----------------------|-------------------|---------------------|------------|---------------------------------------------------------------------------------------------------------------------------------|
| CanFam3.1         | Boxer            | Tasha   | BAC+Sanger sequencing | 2,410,976,875     | 3,310               | 45,876,610 | GCF_000002285.3                                                                                                                 |
| CanFam GSD1.0     | German Shepherd  | Mischka | Pacbio+10X+HiC        | 2,482,000,080     | 2,198               | 64,299,765 | GCA_011100685.1                                                                                                                 |
| ASM864105v3       | German Shepherd  | Nala    | Pacbio+BioNano+HiC    | 2,407,242,830     | 410                 | 64,346,267 | GCA_008641055.3                                                                                                                 |
| UMICH_Zoey_3.1    | Great Dane       | Zoey    | PacBio                | 2,343,218,756     | 794                 | 64,204,256 | GCA_005444595.1                                                                                                                 |
| Basenji_breed-1.1 | Basenji          | Luka    | PacBio                | 2,410,429,933     | 2,243               | 61,087,166 | GCA_004886185.2                                                                                                                 |
| canFamDis_HiC     | Golden Retriever | Scarlet | Illumina+HiC          | 2,507,649,681     | 476,756             | 58,988,005 | <a href="https://www.dnazoo.org/assemblies/Canis_lupus_familiaris">https://www.dnazoo.org/assemblies/Canis_lupus_familiaris</a> |



Supplementary Table 5. ISO-seq reads mapping in different canine assemblies

| Assembly          | BUSCO score | ISO-seq data                               |                                      |                                                       |                                                    |
|-------------------|-------------|--------------------------------------------|--------------------------------------|-------------------------------------------------------|----------------------------------------------------|
|                   |             | N. of mapped reads (change from canFam3.1) | Mapped bases (change from canFam3.1) | N. of reads with >5% mapped based in new assembly (%) | N. of reads with >5% mapped based in canFam3.1 (%) |
| canFam3.1         | 95.20%      | 532,845                                    | 1,533,421,214 bp                     | -                                                     | -                                                  |
| CanFam GSD1.0     | 95.40%      | 532,959 (+0.02%)                           | 1,543,939,818 bp (+0.69%)            | 25,609 (4.80%)                                        | 875 (0.16%)                                        |
| ASM864105v3       | 93.60%      | 532,949 (+0.02%)                           | 1,543,851,433 bp (+0.68%)            | 25,408 (4.76%)                                        | 4,549 (0.85%)                                      |
| UMICH_Zoey_3.1    | 95.20%      | 532,886 (+0.01%)                           | 1,542,024,196 bp (+0.56%)            | 25,361 (4.75%)                                        | 2,087 (0.39%)                                      |
| Basenji_breed-1.1 | 94.80%      | 532,322 (-0.1%)                            | 1,523,786,336 bp (-0.63%)            | 25,134 (4.71%)                                        | 19,470 (3.65%)                                     |
| canFamDis_HiC     | 95.20%      | 532,930 (+0.02%)                           | 1,528,715,704 bp (-0.31%)            | 19,988 (3.74%)                                        | 23,620 (4.43%)                                     |

Supplementary Table 6. 10x sequencing of Mischka and 27 dogs

| Dog id  | Breed                         | Sex    | Access number | Sequencing depth | Average molecule length |
|---------|-------------------------------|--------|---------------|------------------|-------------------------|
| Mischka | German Shepherd               | female | SRR10428535   | 94X              | 32515 bp                |
| BOX_1   | Boxer                         | male   | SRR10441650   | 48X              | 49912 bp                |
| CS_1    | Cocker Spaniel                | female | SRR10441644   | 48X              | 58612 bp                |
| FCR_2   | Flat-coated Retriever         | male   | SRR10441645   | 49X              | 51482 bp                |
| SCH_1   | Schnauzer                     | male   | SRR10441646   | 36X              | 50857 bp                |
| BOX_2   | Boxer                         | male   | SRR10441649   | 32X              | 51860 bp                |
| FCR_1   | Flat-coated Retriever         | female | SRR10441648   | 35X              | 56222 bp                |
| GR_1    | Golden Retriever              | male   | SRR10441647   | 46X              | 37071 bp                |
| BM_1    | Bernese Mountain              | male   | SRR10441652   | 37X              | 48888 bp                |
| CKCS_1  | Cavalier King Charles Spaniel | male   | SRR10441637   | 30X              | 52694 bp                |
| CS_2    | Cocker Spaniel                | female | SRR10441651   | 47X              | 81696 bp                |
| CS_3    | Cocker Spaniel                | female | SRR10441643   | 56X              | 50670 bp                |
| DH_1    | Dachshund                     | female | SRR10441642   | 31X              | 45266 bp                |
| DBM_1   | Dobermann                     | female | SRR10441641   | 88X              | 78645 bp                |
| GSD_1   | German Shepherd               | male   | SRR10441640   | 59X              | 56919 bp                |
| GSD_2   | German Shepherd               | female | SRR10441638   | 39X              | 63405 bp                |
| GSD_3   | German Shepherd               | male   | SRR10441639   | 37X              | 72428 bp                |
| GD_1    | Great Dane                    | female | SRR10441636   | 43X              | 69816 bp                |
| IWH_1   | Irish Wolfhound               | female | SRR10441635   | 38X              | 63311 bp                |
| IWH_2   | Irish Wolfhound               | female | SRR10441634   | 41X              | 63563 bp                |
| LEO_1   | Leonberger                    | male   | SRR10441633   | 31X              | 78586 bp                |
| PUG_1   | Pug                           | male   | SRR10441632   | 30X              | 76245 bp                |
| RTW_1   | Rottweiler                    | male   | SRR10441631   | 32X              | 52249 bp                |
| RTW_2   | Rottweiler                    | male   | SRR10441630   | 56X              | 44930 bp                |
| SS_1    | Springer Spaniel              | female | SRR10441629   | 43X              | 61677 bp                |
| SBT_1   | Staffordshire Bull Terrier    | male   | SRR10441628   | 34X              | 69289 bp                |
| SP_1    | Standard Poodle               | female | SRR10441627   | 44X              | 66798 bp                |
| WM_1    | Weimaraner                    | female | SRR10441626   | 51X              | 59408 bp                |

Supplementary Table 7. Gene expression summary for structural variant loci

| SV       | Locus  | Location <sup>2</sup>       | Gene          | Expression p-value (samples) <sup>1</sup> |                         |                         |
|----------|--------|-----------------------------|---------------|-------------------------------------------|-------------------------|-------------------------|
|          |        |                             |               | Liver                                     | Spleen                  | Heart                   |
| Deletion | MANEA  | chr12:54,394,997-54,440,487 | <i>MANEA</i>  | 0.31 (het=6, del=14)                      | 0.95 (het=5, del=10)    | na                      |
| Deletion | RAB32  | chr1:37,945,215-37,966,816  | <i>RAB32</i>  | 0.17 (wt=6, del=3)                        | na (wt=6, del=2)        | na                      |
| Deletion | POLI   | chr1:21,276,172-21,301,190  | <i>POLI</i>   | na                                        | na                      | 0.95 (wt=3,het=3,del=3) |
| CNV      | OTOA   | chr6:23,345,645-23,406,849  | <i>OTOA</i>   | na (CNV2=5; CNV>2=2)                      | na (CNV2=5; CNV>2=1)    | na                      |
|          |        |                             | <i>IGSF6</i>  | na (CNV2=5; CNV>2=2)                      | na (CNV2=5; CNV>2=1)    | na                      |
|          |        |                             | <i>METTL9</i> | na (CNV2=5; CNV>2=2)                      | na (CNV2=5; CNV>2=1)    | na                      |
| CNV      | PPHLN1 | chr27:34,959,082-35,101,842 | <i>PPHLN1</i> | 0.64 (CNV2=13; CNV>2=7)                   | 0.54 (CNV2=8; CNV>2=7)  | na                      |
|          |        |                             | <i>YAF</i>    | 0.49 (CNV2=13; CNV>2=7)                   | 0.73 (CNV2=4; CNV>2=4)  | na                      |
|          |        |                             | <i>ZCRB1</i>  | 0.13 (CNV2=13; CNV>2=7)                   | 0.614 (CNV2=8; CNV>2=7) | na                      |
| CNV      | CYP1A2 | chr30:38,258,389-38,264,108 | <i>CYP1A2</i> | 0.66 (CNV3=7; CNV>3=11)                   | 0.90 (CNV3=5; CNV>3=9)  | na                      |
|          |        |                             | <i>CLK3</i>   | 0.28 (CNV3=7; CNV>3=8)                    | 0.28 (CNV3=5; CNV>3=8)  | na                      |
|          |        |                             | <i>CSK</i>    | 0.54 (CNV3=7; CNV>3=9)                    | 0.61 (CNV3=5; CNV>3=9)  | na                      |
|          |        |                             | <i>SCAMP2</i> | 0.45 (CNV3=6; CNV>3=7)                    | 0.11 (CNV3=4; CNV>3=4)  | na                      |
|          |        |                             | <i>ULK3</i>   | na (CNV3=2; CNV>3=2)                      | 0.11 (CNV3=2; CNV>3=6)  | na                      |

<sup>1</sup> Samples available per locus per genotype; SV, structural variant type; na, not applicable.

<sup>2</sup> Location with GSD1.0 co-ordinates. For PPHLN1 and CYP1A2, the break point was determined from reads, not PCR validation

Supplementary Table 8. Sequencing data generated from three HiC libraries

| library | Number of read pairs | Bases count (bp) | Coverage | Accession   |
|---------|----------------------|------------------|----------|-------------|
| hic1    | 118,370,222          | 35,747,807,044   | 14.30X   | SRR10428538 |
| hic2    | 133,709,087          | 40,380,144,274   | 16.15X   | SRR10428537 |
| hic3    | 150,143,152          | 45,343,231,904   | 18.14X   | SRR10428536 |

Supplementary Table 9. Public resource of illumina short-read data of 25 dogs

| Sample ID  | Number of paired reads | Reads length (bp) | Sequencing platform | Accession  | Genome coverage | Breed                         |
|------------|------------------------|-------------------|---------------------|------------|-----------------|-------------------------------|
| ISR_BOX_1  | 285156478              | 125               | Illumina HiSeq 2500 | ERR2196023 | 28X             | Boxer                         |
| ISR_CKCS_1 | 276885105              | 125               | Illumina HiSeq 2500 | ERR2196025 | 28X             | Cavalier King Charles Spaniel |
| ISR_DH_1   | 364316971              | 150               | Illumina HiSeq 2000 | ERR3047535 | 43X             | Dachshund                     |
| ISR_PUG_1  | 344029880              | 150               | Illumina HiSeq 2000 | ERR3047544 | 41X             | Pug                           |
| ISR_LEO_1  | 203589257              | 100               | Illumina HiSeq 3000 | SRR7107523 | 16X             | Leonberger                    |
| ISR_CS_1   | 222108500              | 150               | Illumina HiSeq 2500 | SRR7107632 | 26X             | Cocker spaniel                |
| ISR_WM_1   | 192335020              | 150               | Illumina HiSeq 2500 | SRR7107634 | 23X             | Weimaraner                    |
| ISR_GSD_1  | 194141819              | 100               | Illumina HiSeq 2000 | SRR7107763 | 16X             | German Shepherd               |
| ISR_GSD_2  | 188797150              | 100               | Illumina HiSeq 2000 | SRR7107767 | 15X             | German Shepherd               |
| ISR_GSD_3  | 194166764              | 100               | Illumina HiSeq 2000 | SRR7107769 | 16X             | German Shepherd               |
| ISR_CS_2   | 176178243              | 100               | Illumina HiSeq 2000 | SRR7107863 | 14X             | English cocker spaniel        |
| ISR_SCH_1  | 218290866              | 100               | Illumina HiSeq 2000 | SRR7107866 | 17X             | Standard Schnauzer            |
| ISR_SS_1   | 406968239              | 100               | Illumina HiSeq 2000 | SRR7107883 | 31X             | English Springer Spaniel      |
| ISR_SP_1   | 276357019              | 100               | Illumina HiSeq 2000 | SRR7107900 | 22X             | Standard Poodle               |
| ISR_DBM_1  | 372622195              | 100               | Illumina HiSeq 2000 | SRR7107901 | 29X             | Doberman                      |
| ISR_GR_1   | 376930517              | 100               | Illumina HiSeq 2000 | SRR7107926 | 29X             | Golden retriever              |
| ISR_GD_1   | 250616106              | 100               | Illumina HiSeq 2500 | SRR7107941 | 20X             | Great Dane                    |
| ISR_BM_1   | 473640347              | 125               | Illumina HiSeq 2500 | SRR7120127 | 47X             | Bernese Mountain Dog          |
| ISR_FCR_1  | 410367234              | 125               | Illumina HiSeq 2500 | SRR7120158 | 41X             | Flat-coated retriever         |
| ISR_RTW_1  | 241991725              | 150               | Illumina HiSeq 2500 | SRR7120208 | 22X             | Rottweiler                    |
| ISR_RTW_2  | 502519042              | 125               | Illumina HiSeq 2500 | SRR7120209 | 50X             | Rottweiler                    |
| ISR_BOX_2  | 320189252              | 100               | Illumina HiSeq 2000 | SRR8541911 | 23X             | Boxer                         |
| ISR_IWH_1  | 370755703              | 100               | Illumina HiSeq 2000 | SRR8541930 | 24X             | Irish Wolfhound               |
| ISR_IWH_2  | 377090701              | 100               | Illumina HiSeq 2000 | SRR8541931 | 24X             | Irish Wolfhound               |
| ISR_CS_3   | 208440846              | 100               | Illumina HiSeq 2500 | SRR8614081 | 16X             | English cocker spaniel        |

## Supplementary References

1. Tengvall, K. et al. Genome-Wide Analysis in German Shepherd Dogs Reveals Association of a Locus on CFA 27 with Atopic Dermatitis. *PLOS Genet.* 9, e1003475 (2013).
