# Supplementary material for: A novel canine reference genome resolves genomic architecture and uncovers transcript complexity
Source: PubMed Central journal article supplement (PMC7875987; doi:10.1038/s42003-021-01698-x), 2021-02-10
Supplement: 42003_2021_1698_MOESM2_ESM.pdf [file 42003_2021_1698_MOESM2_ESM.pdf]

## **Description of Additional Supplementary Files**

File Name: Supplementary Data 1

Description: Datasets used for annotation

File Name: Supplementary Data 2

Description: Primers used for validation and genotyping

File Name: Supplementary Data 3

Description: Dark and camouflaged regions detected in each dog

File Name: Supplementary Data 4

Description: Tissues samples and genotyping results for expression analysis
